# Supplementary material for: Silver-coated magnetic nanocomposites induce growth inhibition and protein changes in foodborne bacteria
Source: PubMed Central journal article supplement (PMC6877574; doi:10.1038/s41598-019-53080-x), 2019-11-25

**Silver-coated magnetic nanocomposites induce growth inhibition  
and protein changes in foodborne bacteria**

Seong B. Park<sup>1</sup>, Shecoya B. White<sup>2</sup>, Christy S. Steadman<sup>1</sup>, Tibor Pechan<sup>3</sup>, Olga Pechanova<sup>3</sup>,  
Henry J. Clemente<sup>4</sup>, Rooban VKG Thirumalai<sup>5</sup>, Scott T. Willard<sup>1,6</sup>, Peter L. Ryan<sup>1,7</sup>, Jean M.  
Feugang<sup>1,\*</sup>

**Supplementary Figure 2. Representative two-dimensional electrophoresis of Control (A) and Ag-MNP treated (B) *E. coli*.** Extracted protein samples were successively separated by isoelectric focusing (pI 4-7) and 4-20% gradient SDS-PAGE. Significantly ( $p < 0.05$ ) differentially detected protein spots are indicated with black (down-regulated) and purple (up-regulated) colored arrows in Micrograph A, while opposite indications are shown in Micrograph B (black = up-regulated and Purple = down-regulated).

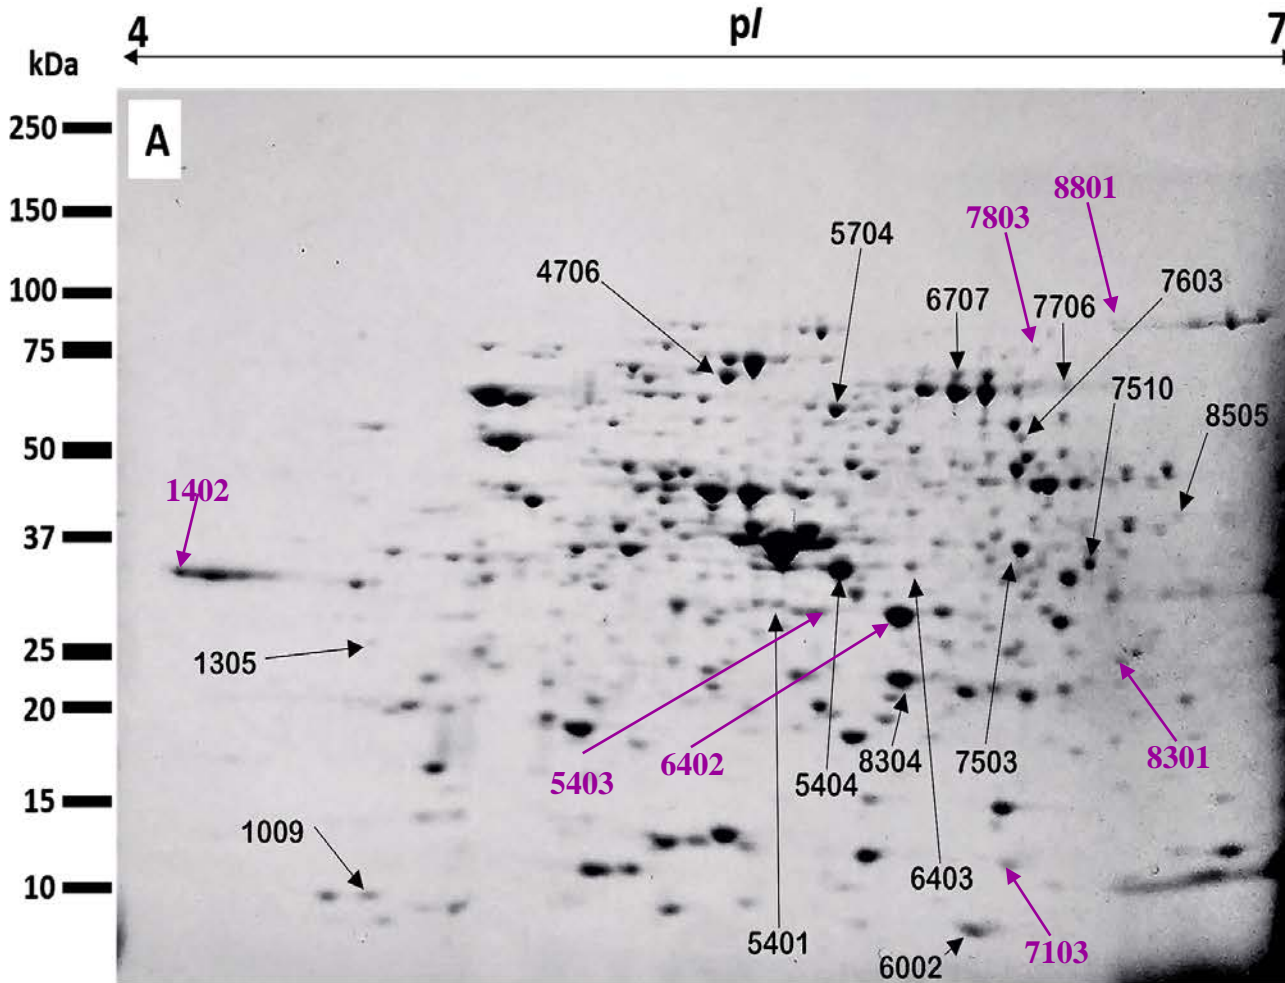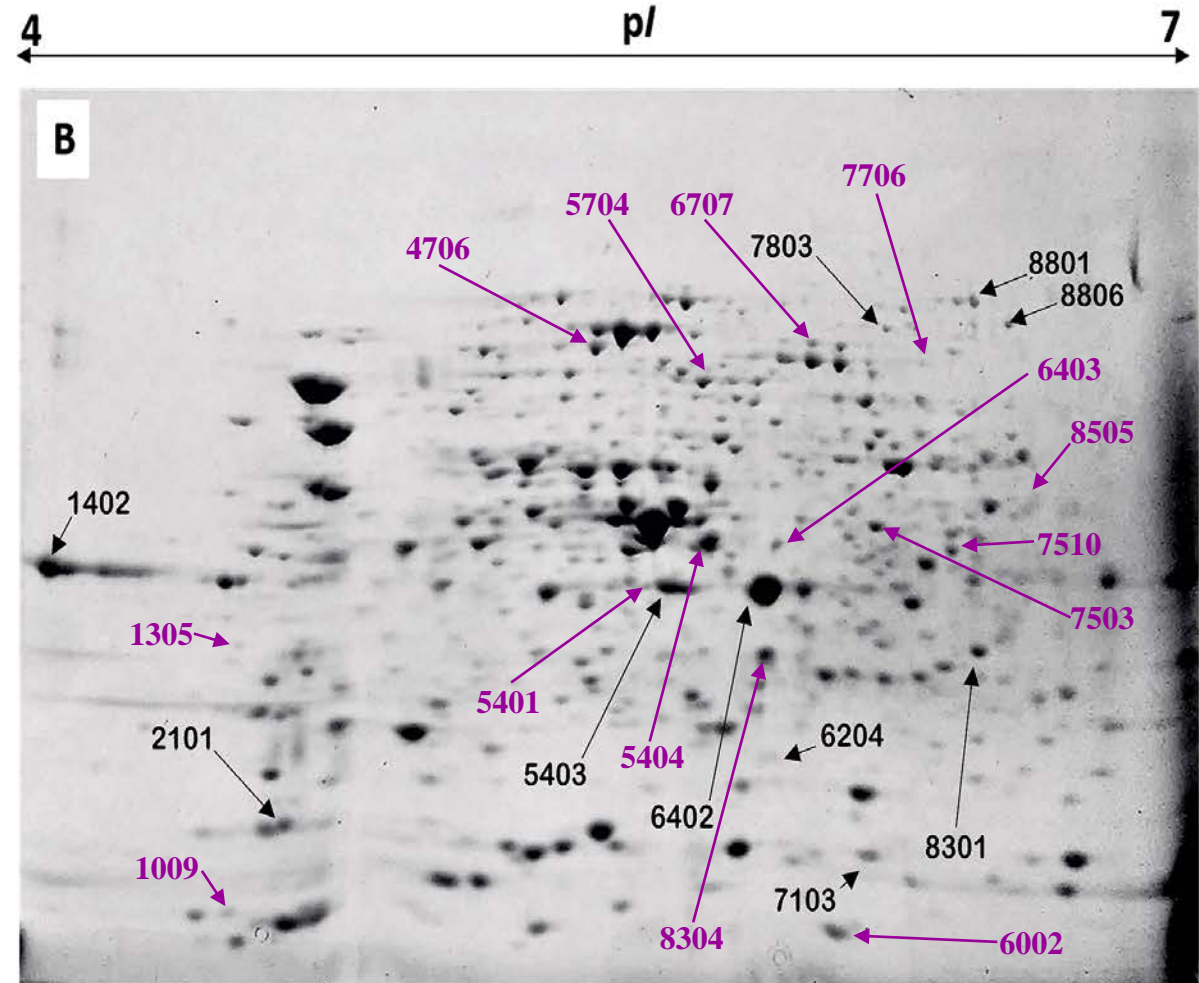

Supplement: 41598_2019_53080_MOESM2_ESM.pdf [file 41598_2019_53080_MOESM2_ESM.pdf]
